# Supplementary material for: Osteocyte-Derived CaMKK2 Regulates Osteoclasts and Bone Mass in a Sex-Dependent Manner Through Secreted Calpastatin
Source: Preprints.org preprint supplement (doi:10.20944/preprints202302.0002.v1), 2023-02-01

**Osteocyte-Derived CaMKK2 Regulates Osteoclasts and Bone Mass in a Sex-Dependent  
Manner Through Secreted Calpastatin**

Justin N. Williams<sup>1,2</sup>, Mavis Irwin<sup>1,2</sup>, Yong Li<sup>1,2</sup>, Anuradha Valiya Kambrath<sup>1,2</sup>, Brett T.  
Mattingly<sup>1,2</sup>, Sheel Patel<sup>1,2,3</sup>, Mizuho Kittaka<sup>2,4</sup>, Rebecca N. Collins<sup>1,2</sup>, Nicholas A. Clough<sup>1,2</sup>,  
Noyonika Mukherjee<sup>1,2</sup>, Emma H. Doud<sup>5</sup>, Amber L. Mosley<sup>5</sup>, Teresita Bellido<sup>1,2</sup>, Angela  
Bruzzaniti<sup>2,4</sup>, Lilian I. Plotkin<sup>1,2</sup>, Jonathan C. Trinidad<sup>6</sup>, William R. Thompson<sup>1,2,7</sup>, Lynda F.  
Bonewald<sup>1,2</sup>, and Uma Sankar<sup>1,2</sup>

<sup>1</sup>Department of Anatomy, Cell Biology and Physiology, Indiana University School of Medicine,  
Indianapolis, IN 46202, USA; <sup>2</sup>Indiana Center for Musculoskeletal Health, Indiana University  
School of Medicine, Indianapolis, IN 46202, USA; <sup>3</sup>Division of Biomedical Science, Marian  
University College of Osteopathic Medicine, Indianapolis, IN 46022, USA; <sup>4</sup>Department of  
Biomedical Sciences and Comprehensive Care, Indiana University, School of Dentistry,  
Indianapolis, IN 46202, USA; <sup>5</sup>Department of Biochemistry and Molecular Biology, Indiana  
University School of Medicine, Indianapolis, IN 46202, USA; <sup>6</sup>Department of Chemistry,  
Biological Mass Spectrometry Facility, Indiana University, Bloomington, IN 47405, USA;  
<sup>7</sup>Department of Physical Therapy, School of Health and Rehabilitation Sciences, Indianapolis,  
IN 46202, USA.

**#Address correspondences to:** Uma Sankar, Ph.D., 635 Barnhill Drive, MS-5055,  
Indianapolis, IN 46202 USA. Tel: (317) 274-7870, Fax: (317) 856-5710; Email: [usankar@iu.edu](mailto:usankar@iu.edu).

**Running Title:** Female Osteocyte-Derived CaMKK2-Extracellular Calpastatin Mechanism  
Regulates Osteoclasts

**Supplementary Figure 1: Conditional deletion of CaMKK2 from osteocytes does not impact cortical bone geometry in female or male mice. (A)** Representative crosssections of the femoral midshaft of female and male control and *Camkk2*<sup>ΔOCY</sup> mice. Cortical bone parameters for female and male Control and *Camkk2*<sup>ΔOCY</sup> femurs including **(Ai, Bi)** cortical bone area, **(Aii, Bii)** cross-sectional thickness and **(Aiii, Biii)** polar moment of inertia. Error bars represent SD.

**Supplementary Figure 2: Expression of classical bone remodeling factors remain unaltered in CaMKK2-deficient osteocytes. (A-B)** Expression of *Rankl* and *Opg* mRNA, as well as the *Rankl/Opg* ratio in osteocytes isolated from individual female and male control and *Camkk2*<sup>ΔOCY</sup> mice (n=10-12 mice/group). *Rankl* and *Opg* mRNA levels were normalized to those of *β-Actin*.

**Supplementary Figure 3: Treatment with non-cell permeable recombinant calpastatin results in a dose-dependent inhibition of OCs in a sex-divergent manner. (A)** Representative images (magnification – 40X) showing hydroxyapatite resorption pits generated by female and male WT OCs that were treated with 0, 0.1 μM, 0.5 μM, 1.0 μM and 5.0 μM NCP human calpastatin domain I. BM-derived monocytes were treated with the indicated dose of recombinant calpastatin in OC media containing RANKL and M-CSF1 for 6 days. **(B, E)** total number of pits measured; **(C, F)** percent area resorbed; and **(D, G)** number of TRAP-positive osteoclasts with ≥ 3 nuclei, in male and female cohorts, respectively. Error bars represent SD. \**p*<0.05, \*\**p*<0.01, \*\*\**p*<0.001, \*\*\*\**p*<0.0001.

**Supplementary Figure 4: Conditioned media from CaMKK2-deficient osteocytes does not affect osteoclast precursor migration or intracellular levels of Cast in OCs. (A-B)** Representative phase contrast images (magnification 100X) of WT BM-derived OC precursors at **(A)** 0 hours (immediately after scratch) and **(B)** 18 hours post-scratch. **(C)** Percent of area within the scratch generated gap that was covered by OC precursors at 18 hours post-scratch

50 as calculated using ImageJ software. **(D)** Representative immunoblots showing levels of  
51 intracellular talin (calpain substrate), calpastatin, phosphorylated PKA-C and total PKA-C  
52 (upstream activator of calpains) relative to b-Actin in WT OCs, following treatment with female  
53 control osteocyte CM or *Camkk2*<sup>ΔOCy</sup> osteocyte CM depleted of calpastatin or treated with  
54 control IgG.

A

Female

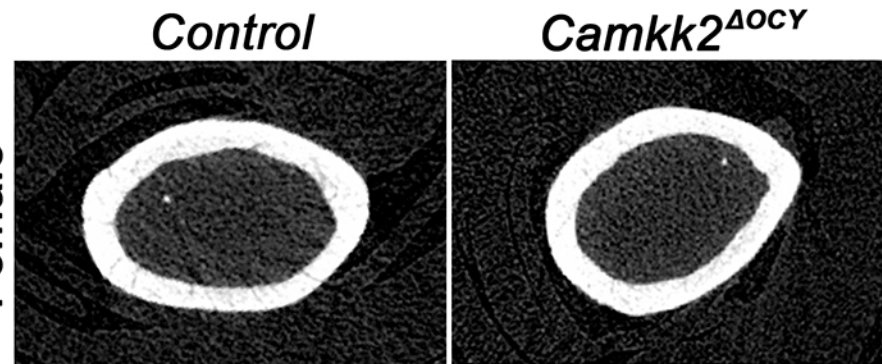

B

Male

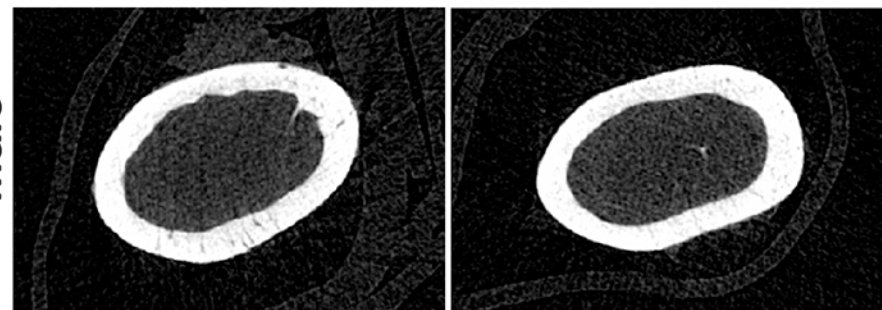

Ai

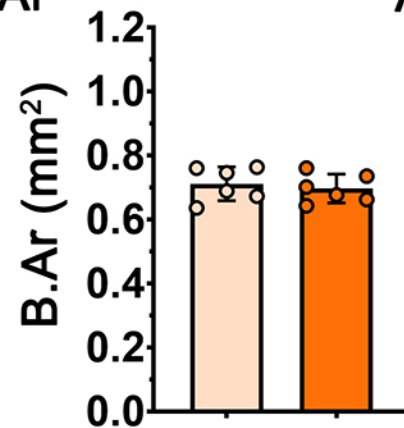

Aii

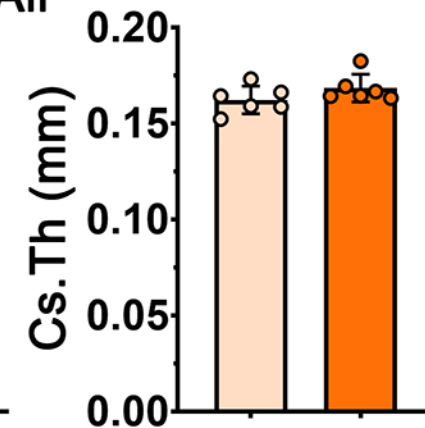

Aiii

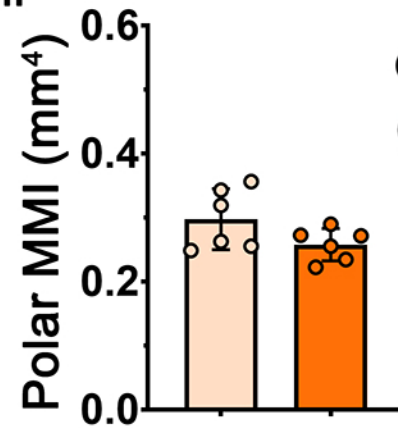

○ ♀ Control  
● ♀ Camkk2<sup>ΔOCY</sup>

Bi

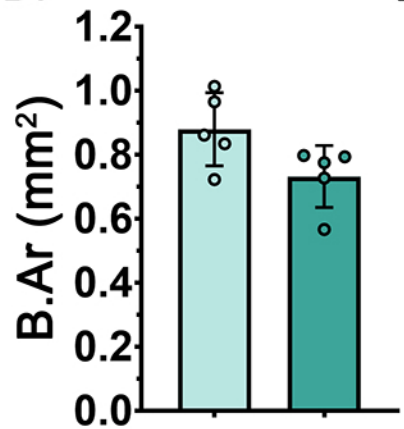

Bii

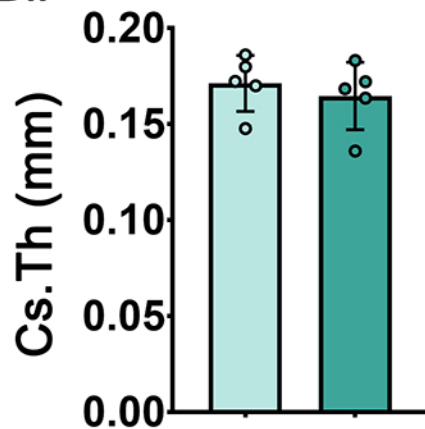

Biii

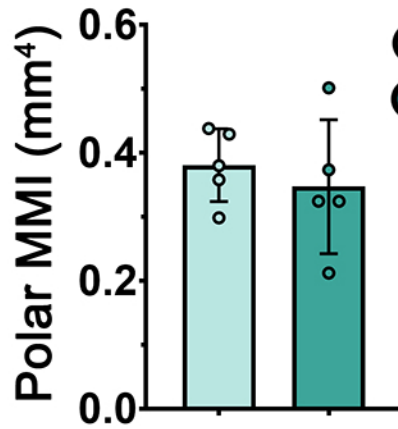

○ ♂ Control  
● ♂ Camkk2<sup>ΔOCY</sup>



A

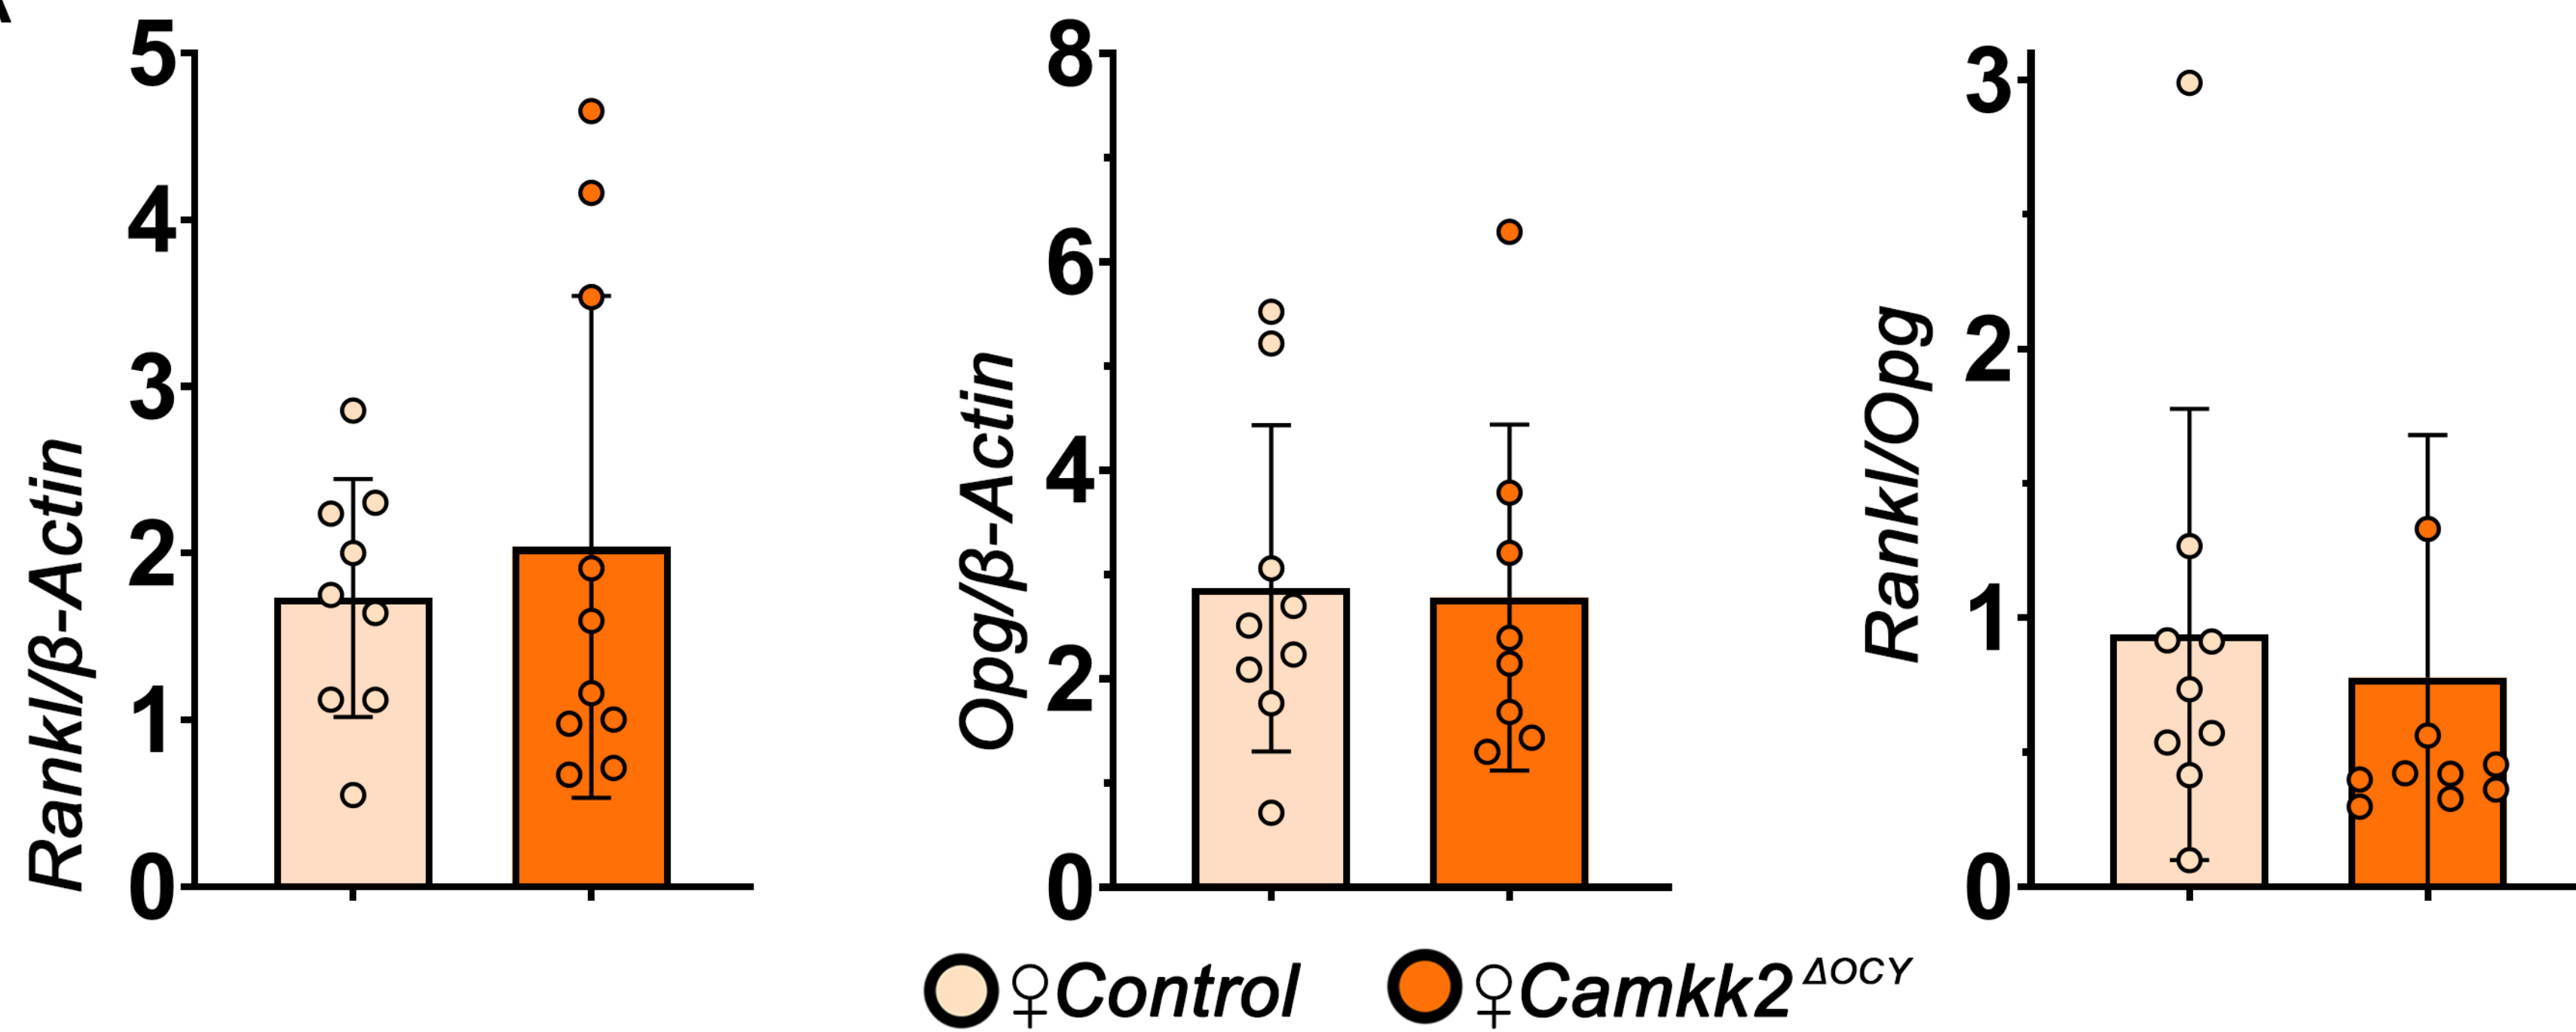

B

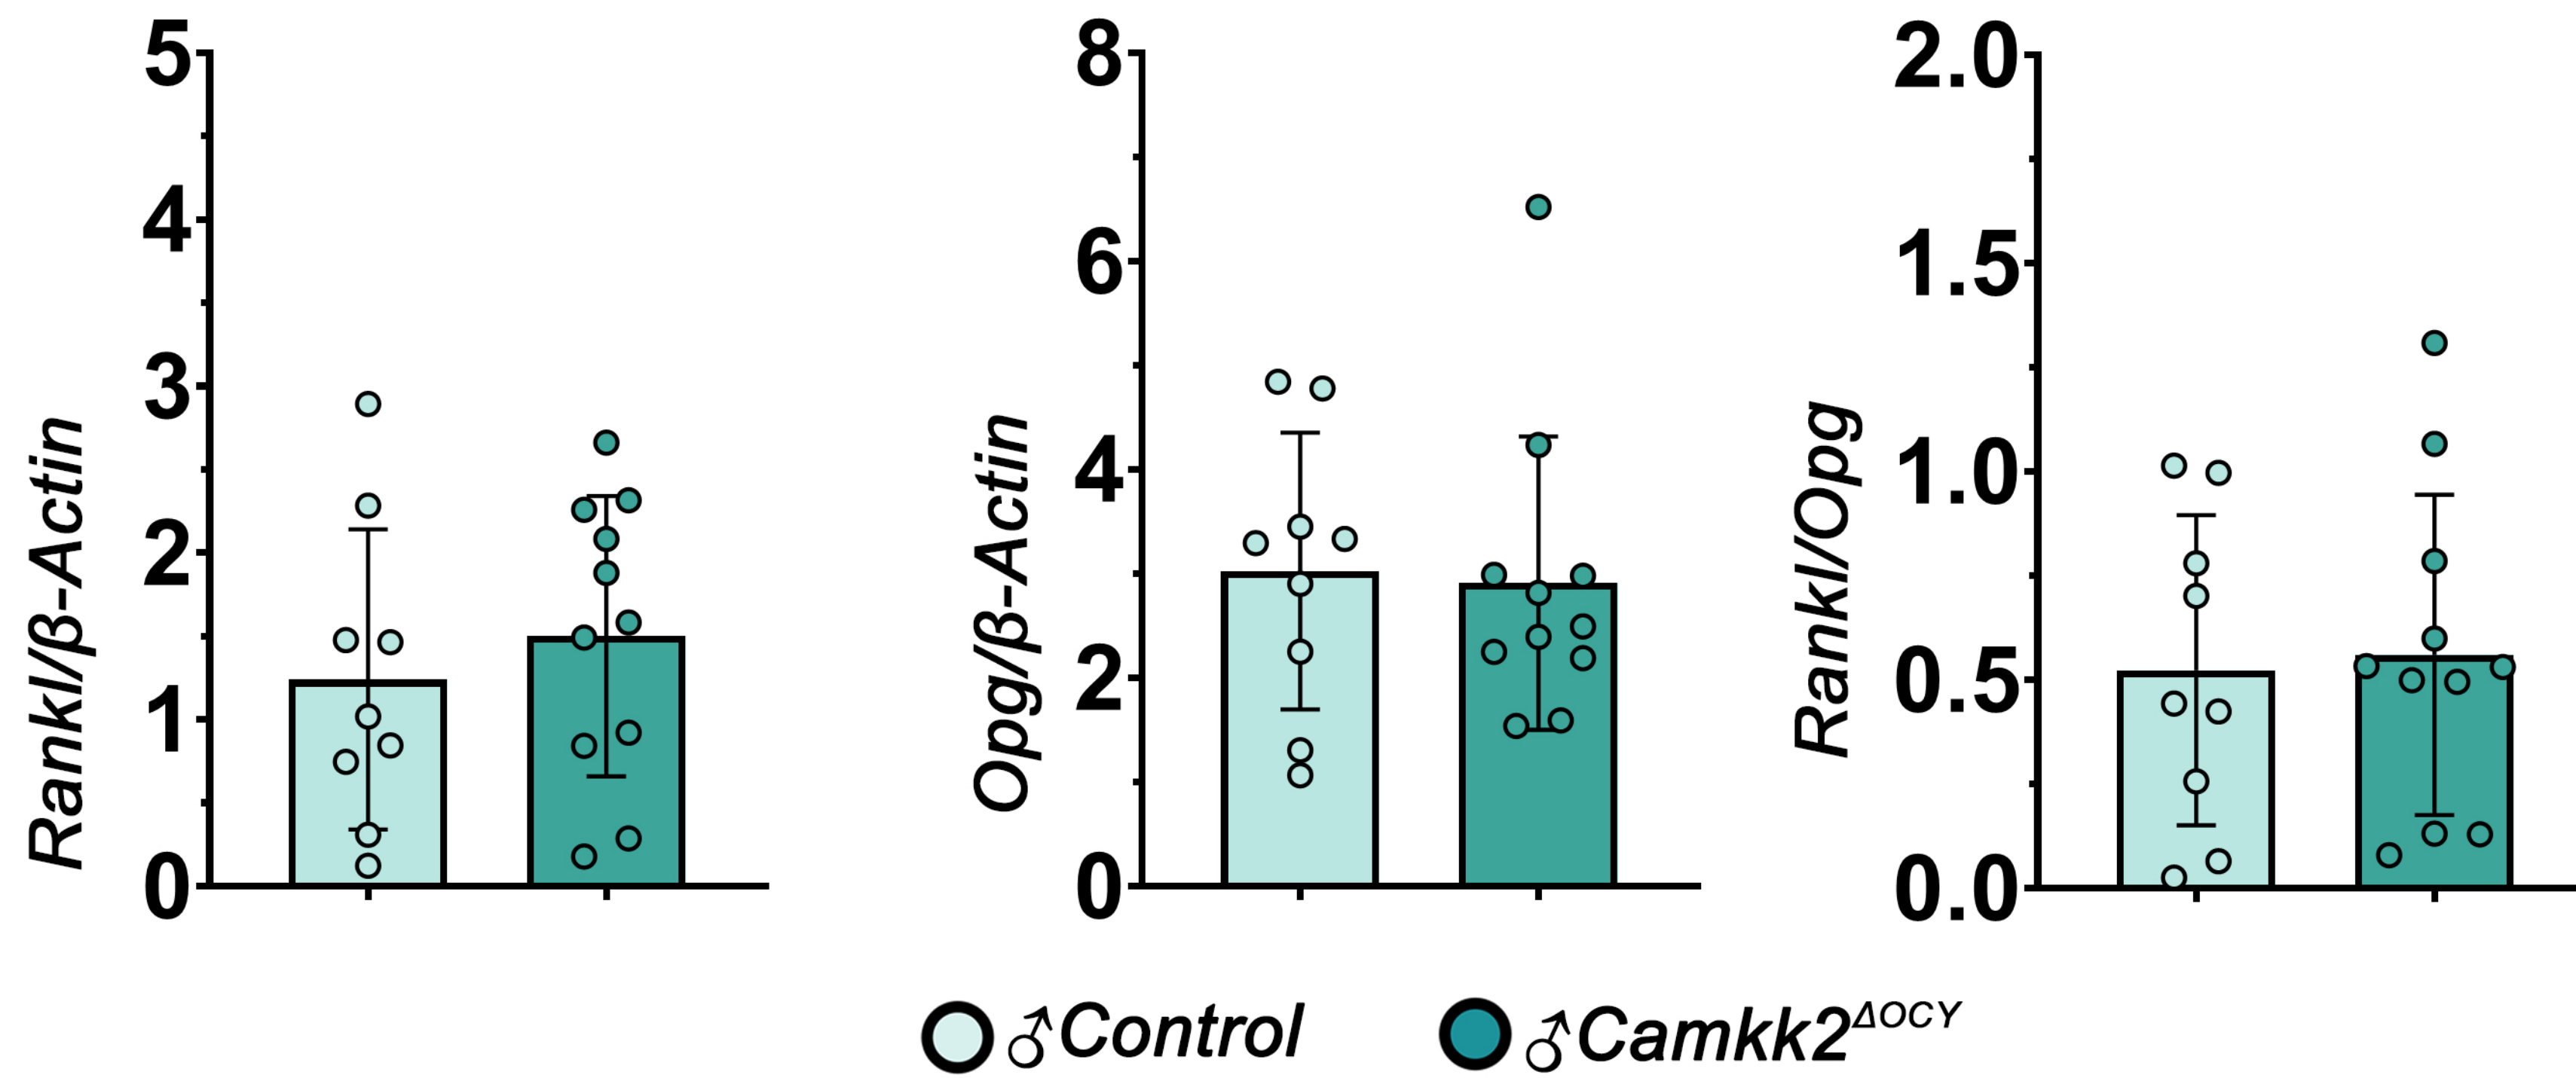

**A** **Recombinant Calpastatin Domain I - Non Cell Permeable**

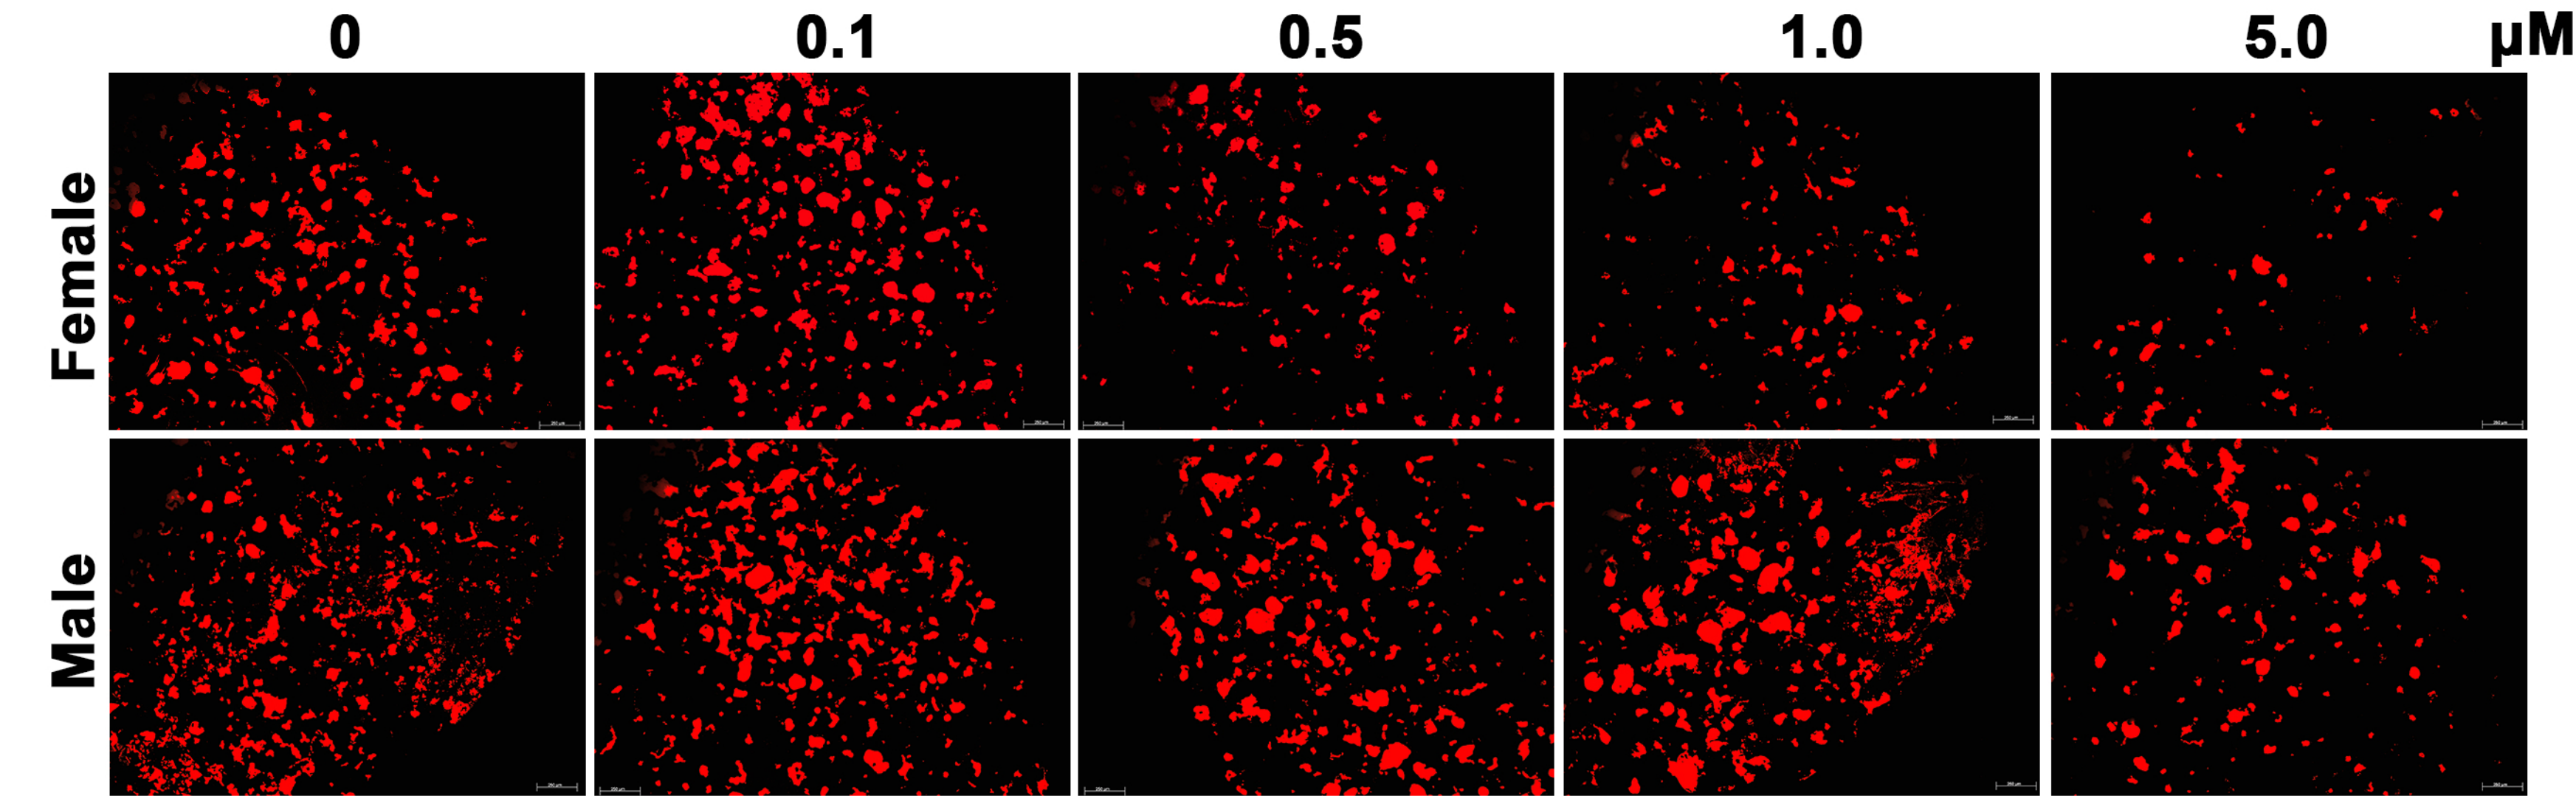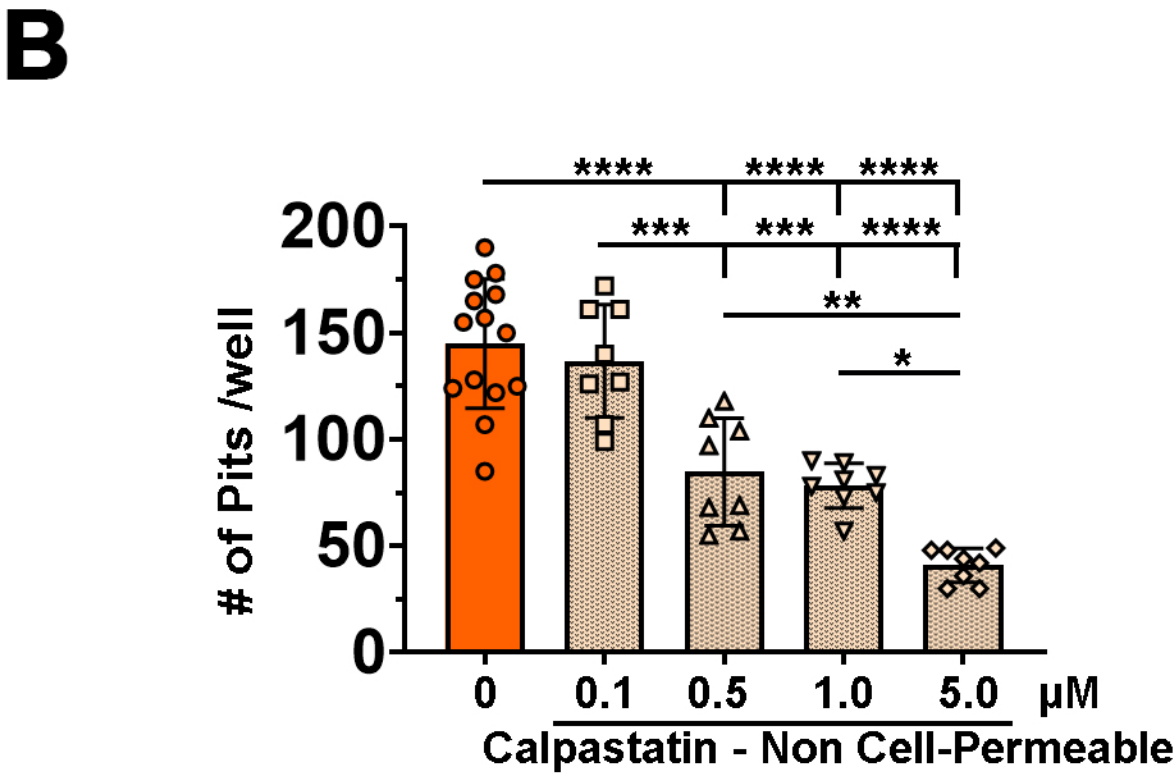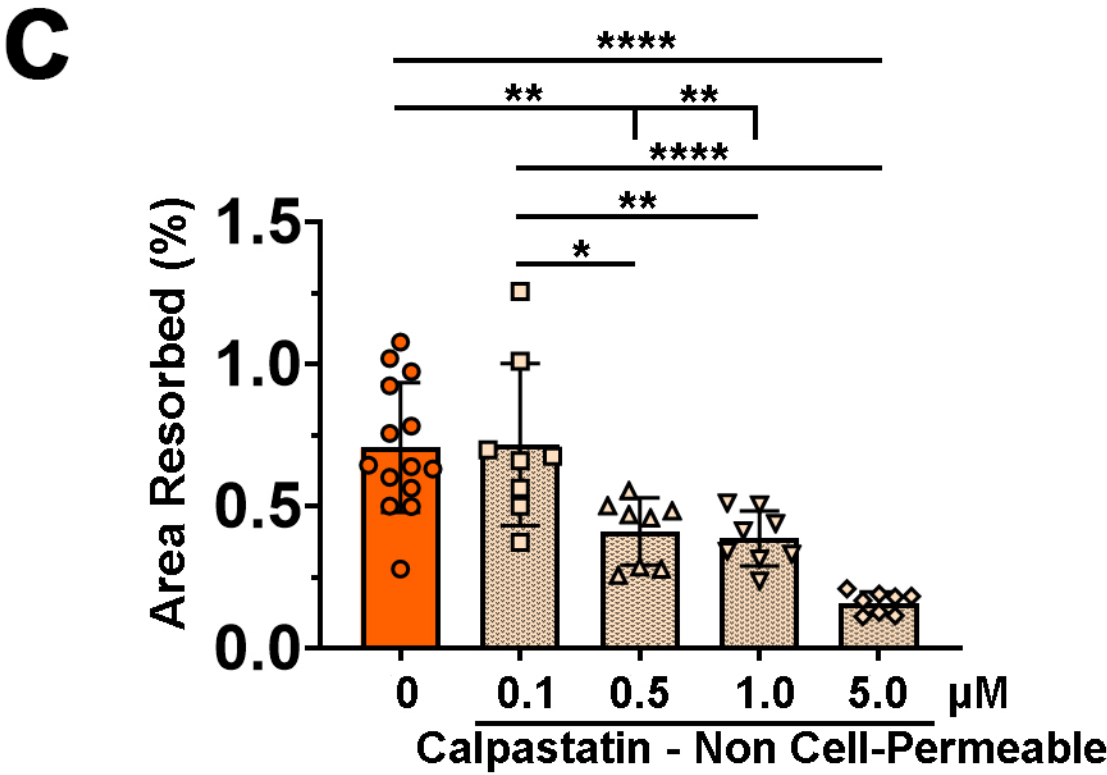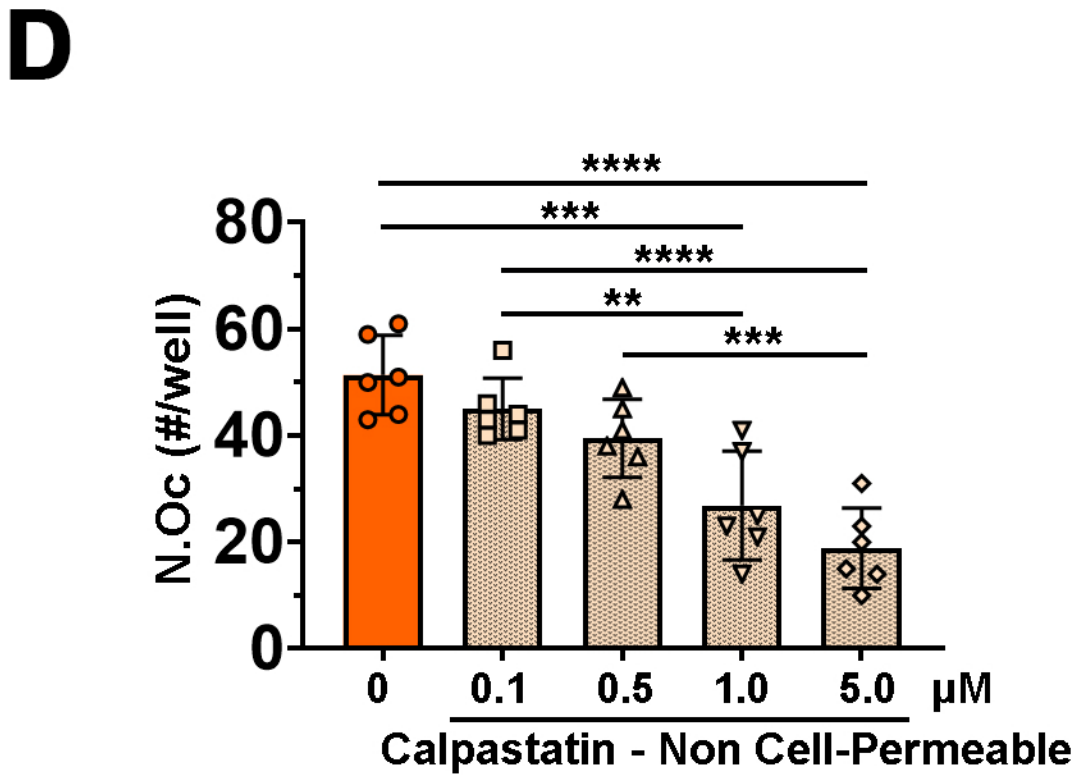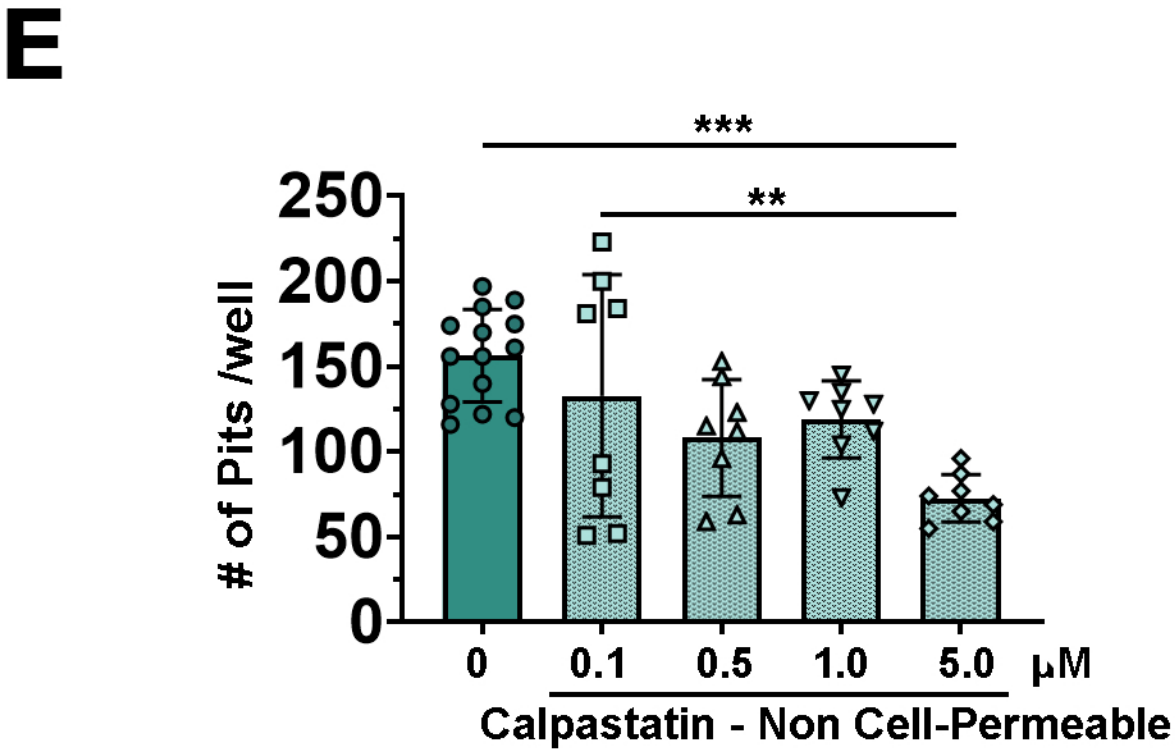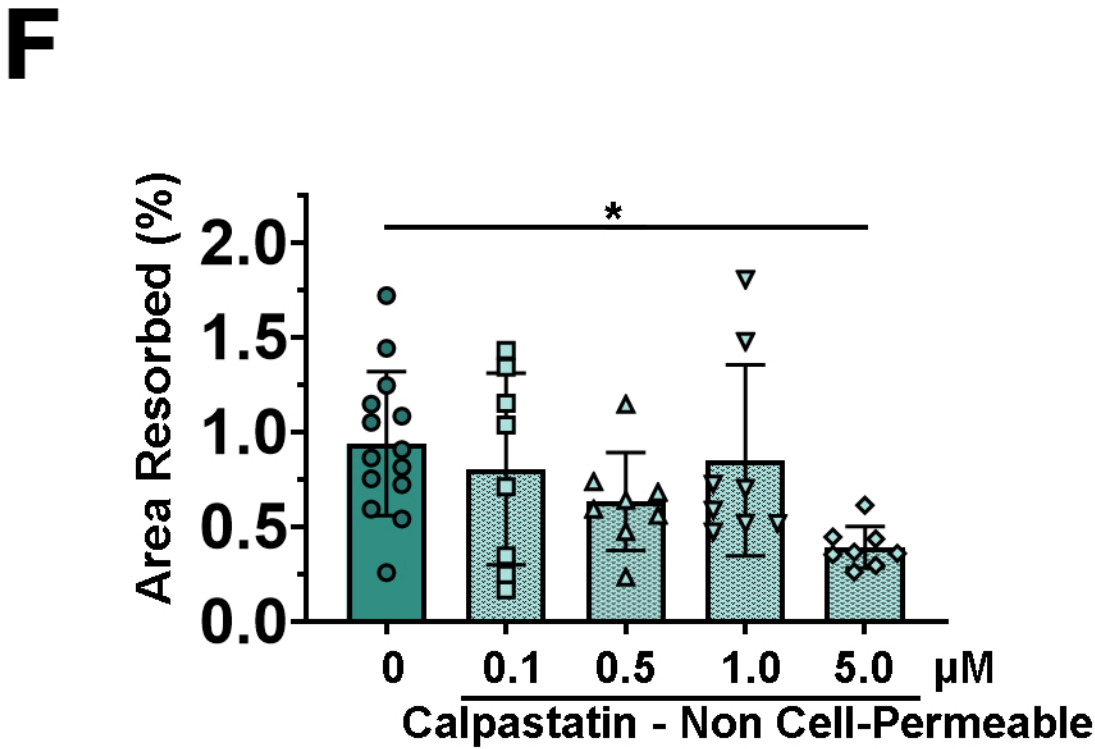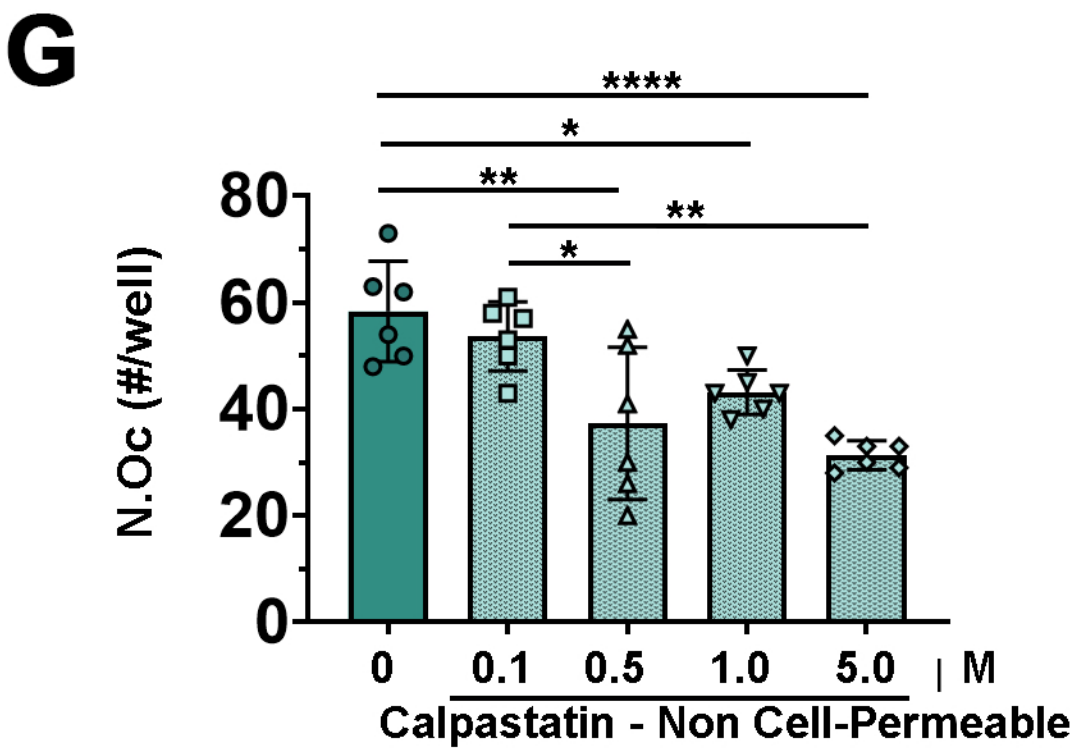



♀ *Camkk2*<sup>ΔOCY</sup>

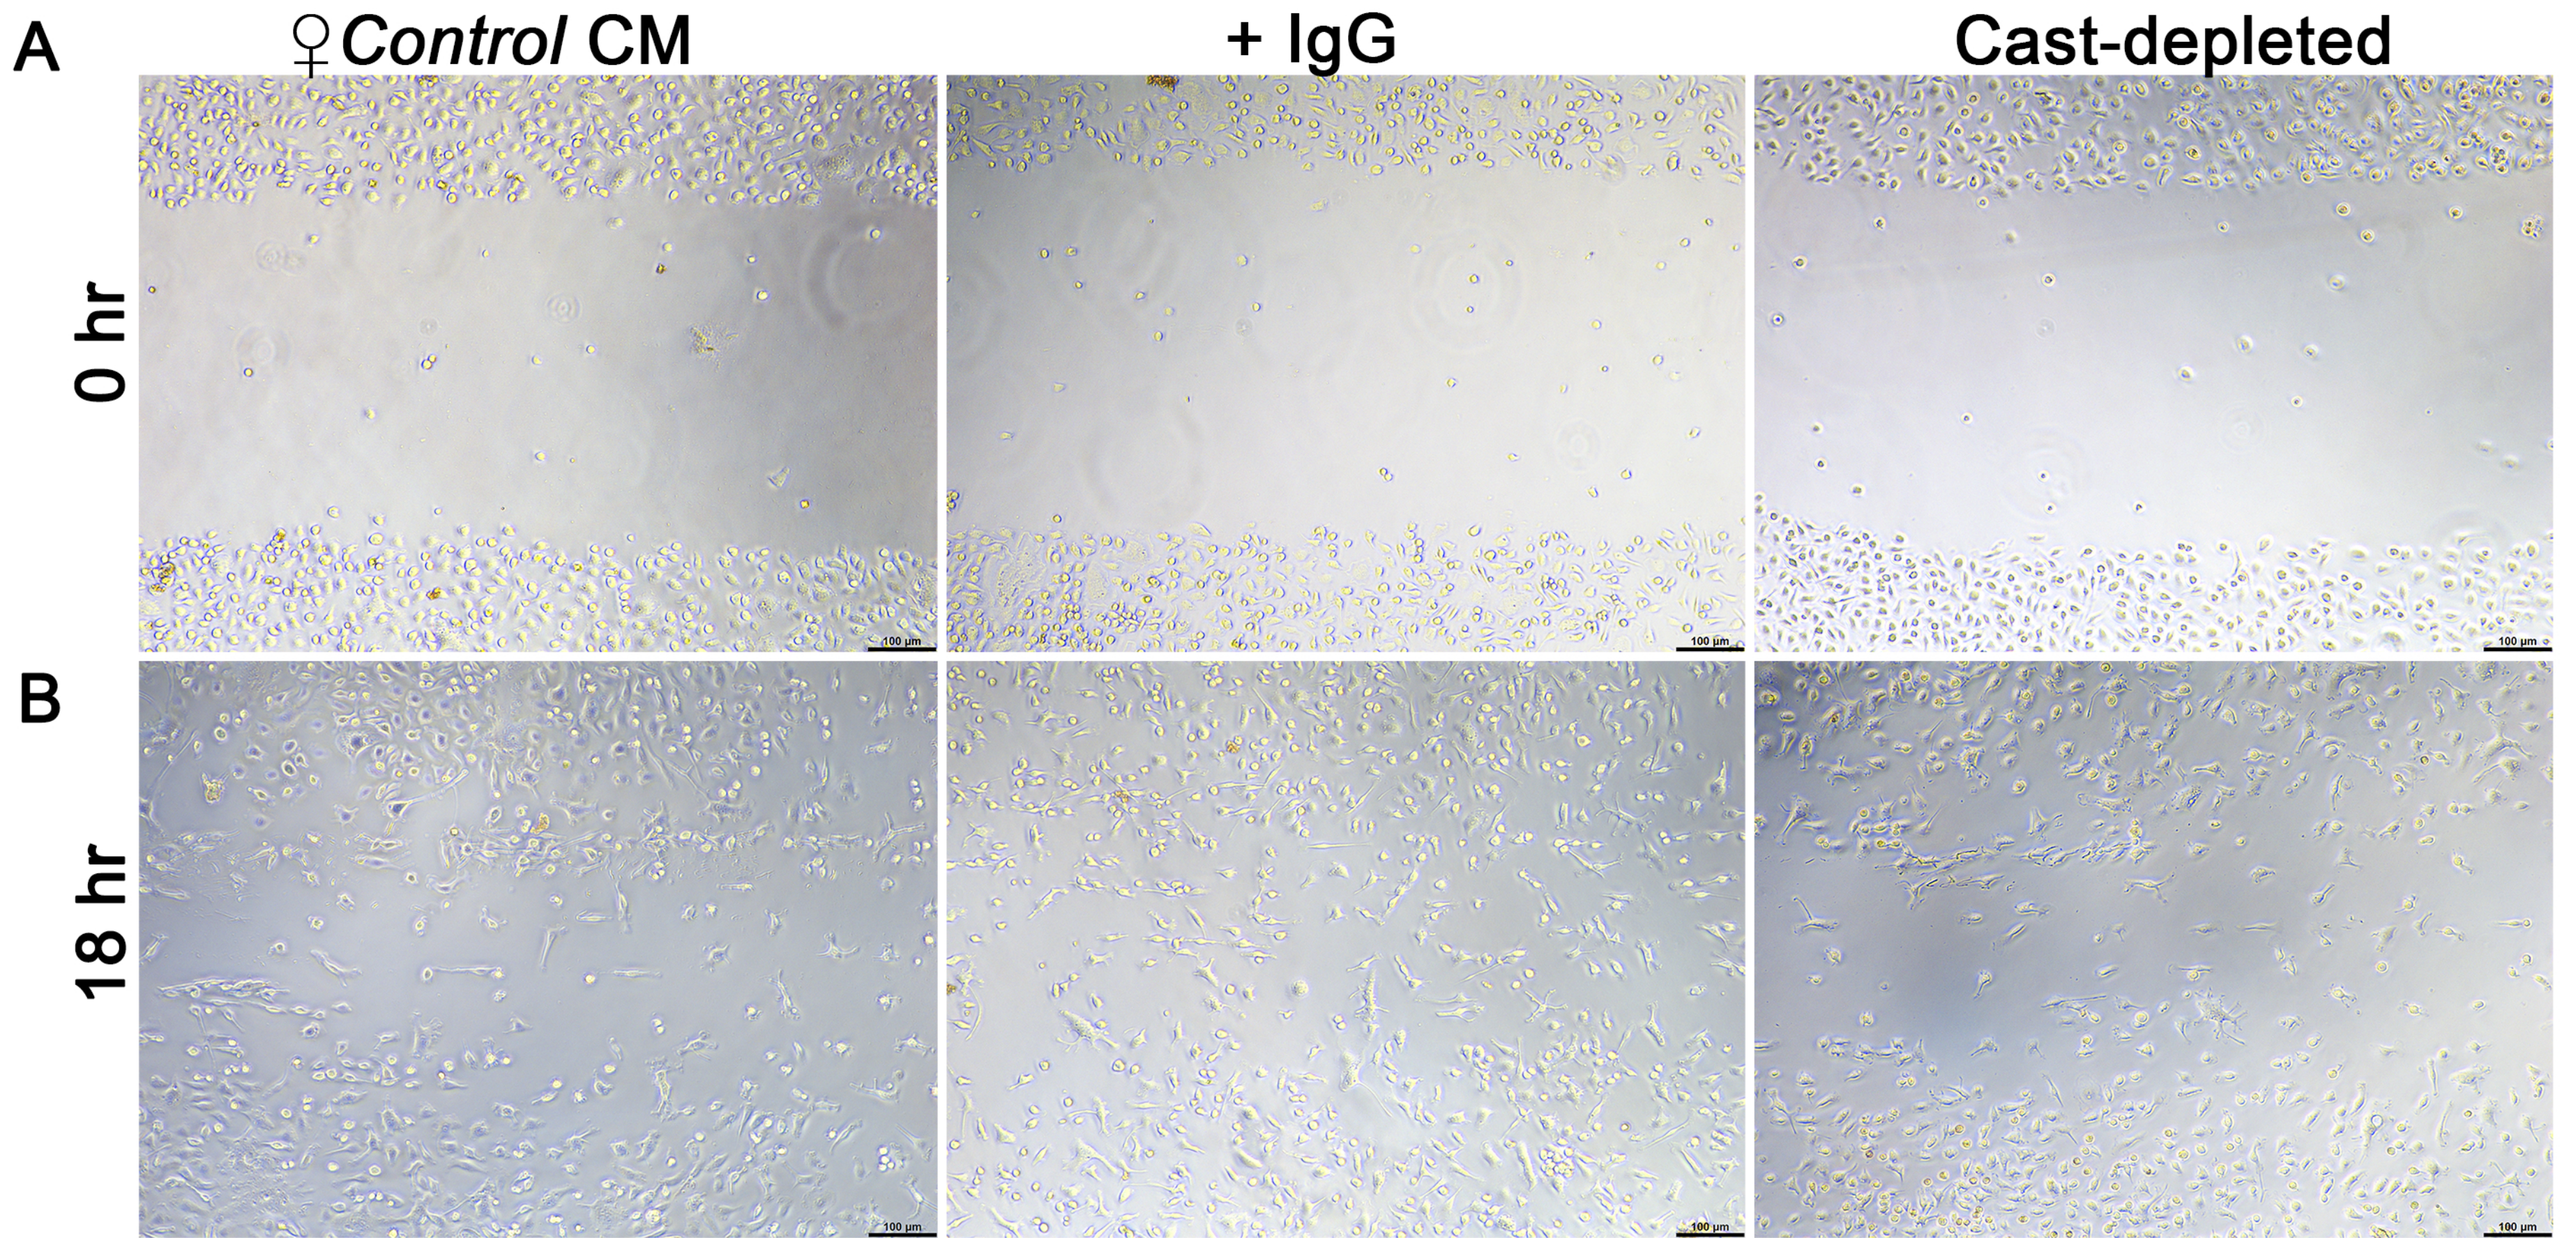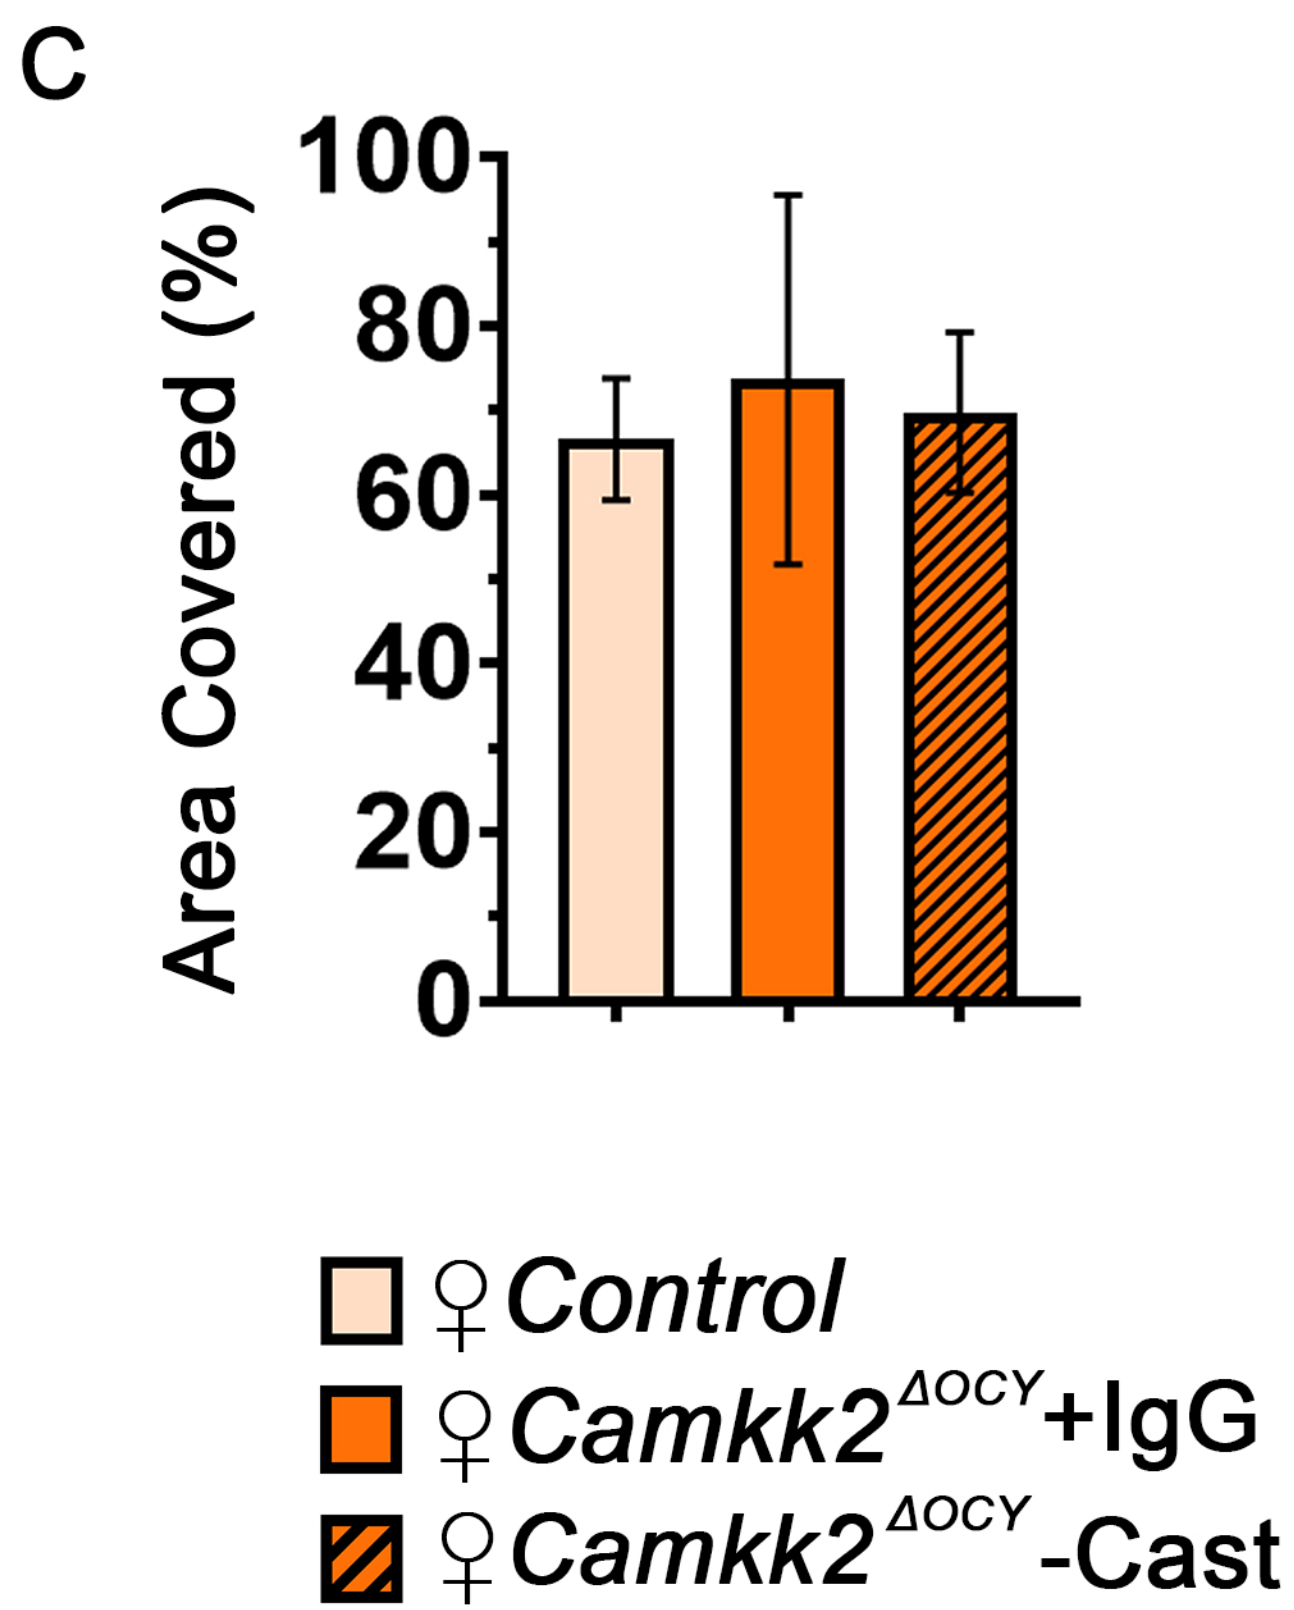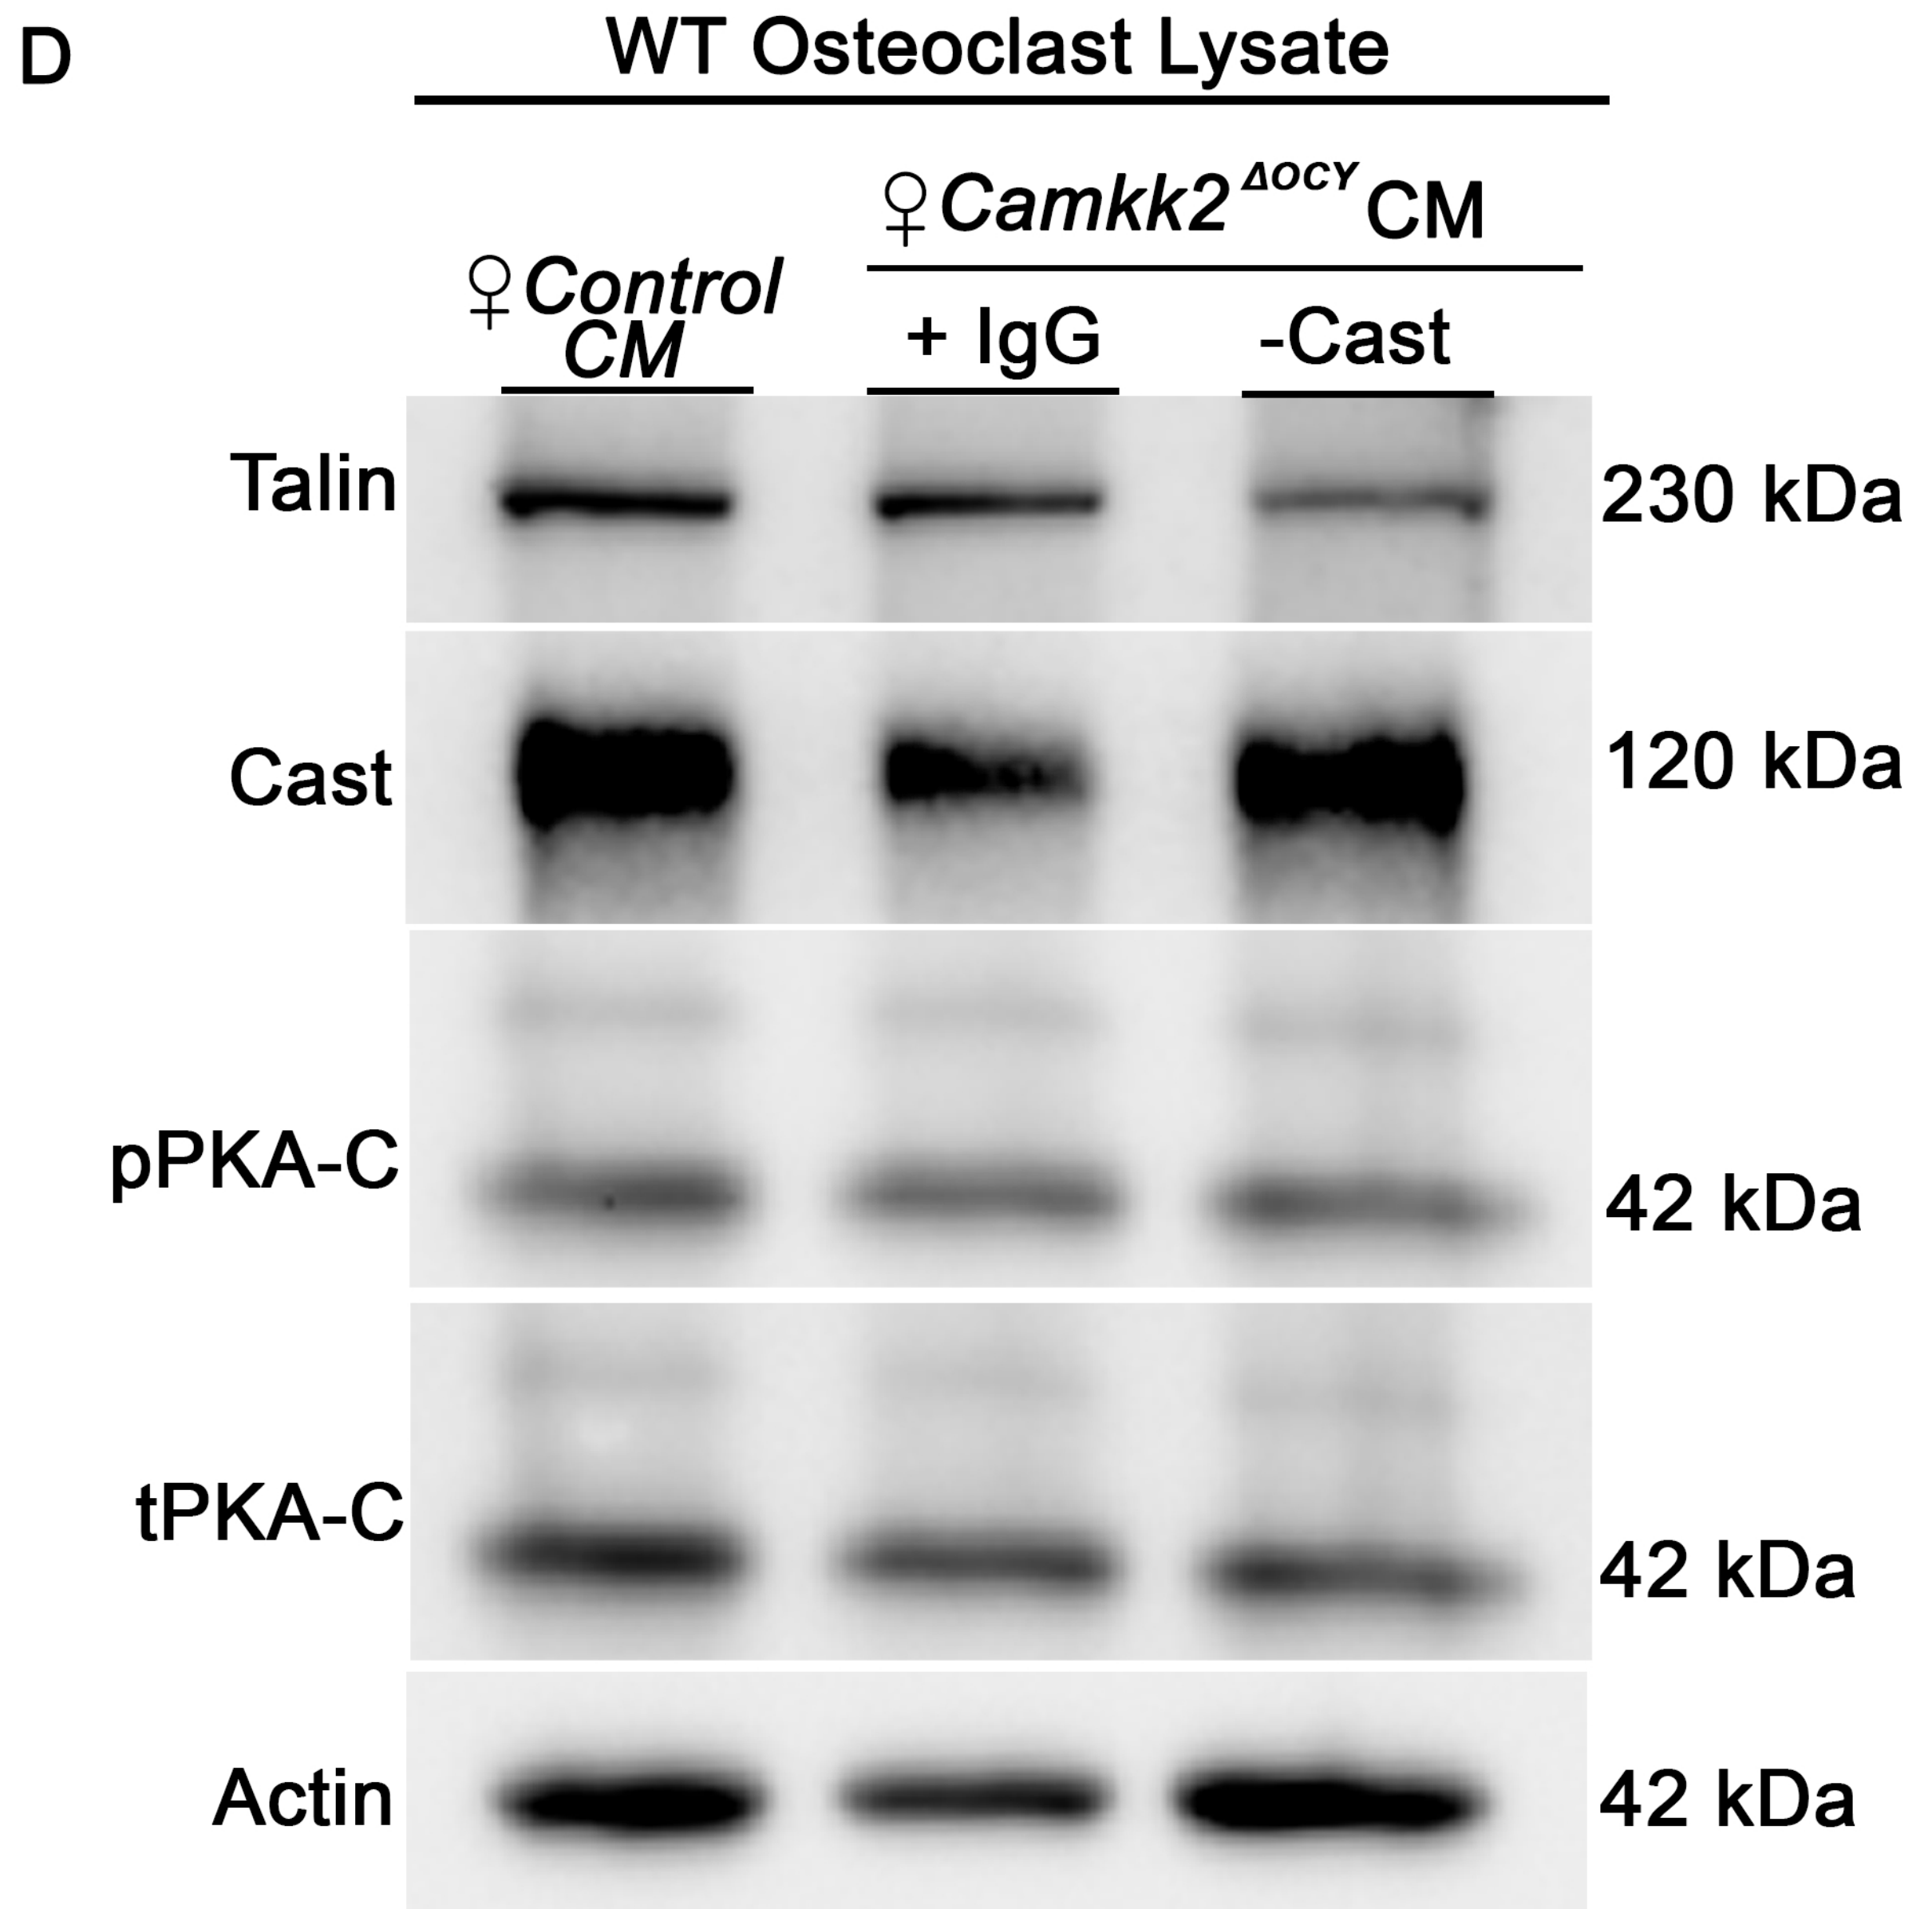

Supplement: Supplementary file 1 [file supplementary]
